# Supplementary material for: Synergy between iron oxide sites and nitrogen-doped carbon xerogel/diamond matrix for boosting the oxygen reduction reaction
Source: Royal Society of Chemistry journal article supplement (doi:10.1039/d1na00776a), 2022-01-01
Supplement: d1na00776a2.pdf [file d1na00776a2.pdf]

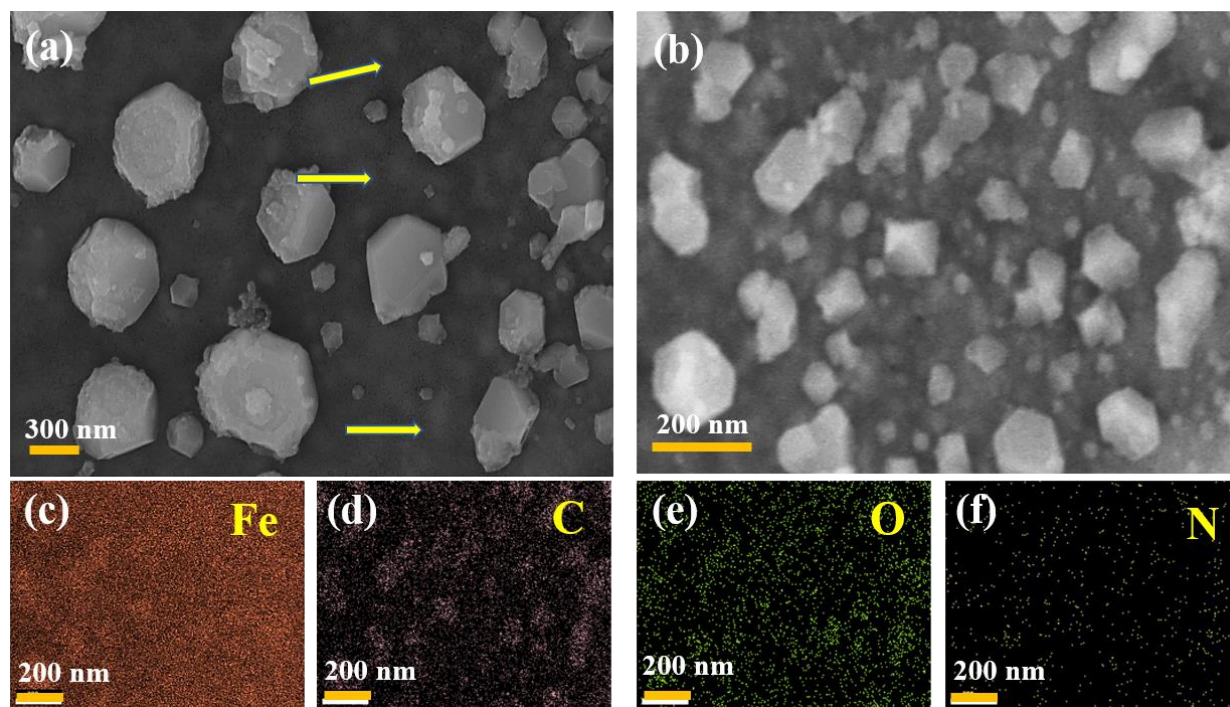

**Figure S1** (a) Top SEM images of the FeO<sub>x</sub>@NCD with arrow pointed to impregnated FeO<sub>x</sub> in carbon matrix. (b) SEM images of FeO<sub>x</sub>@NCD with corresponding elemental mapping images for iron (c), carbon (d), oxygen (e), and nitrogen (f).

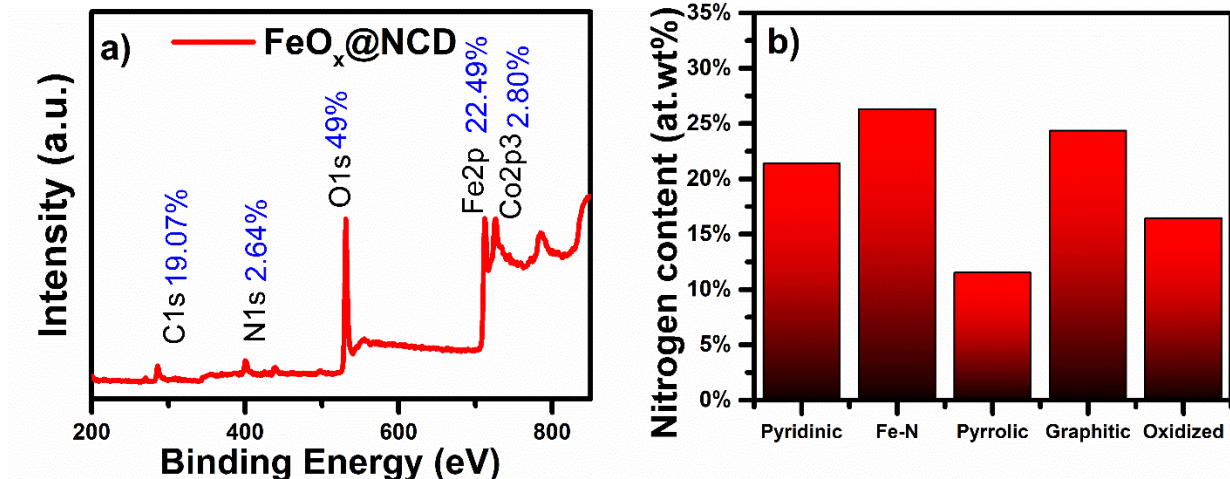

**Figure S2.** (a) XPS survey spectrum of the FeO<sub>x</sub>@NCD, (b) the contents of different types of nitrogen in the FeO<sub>x</sub>@NCD.

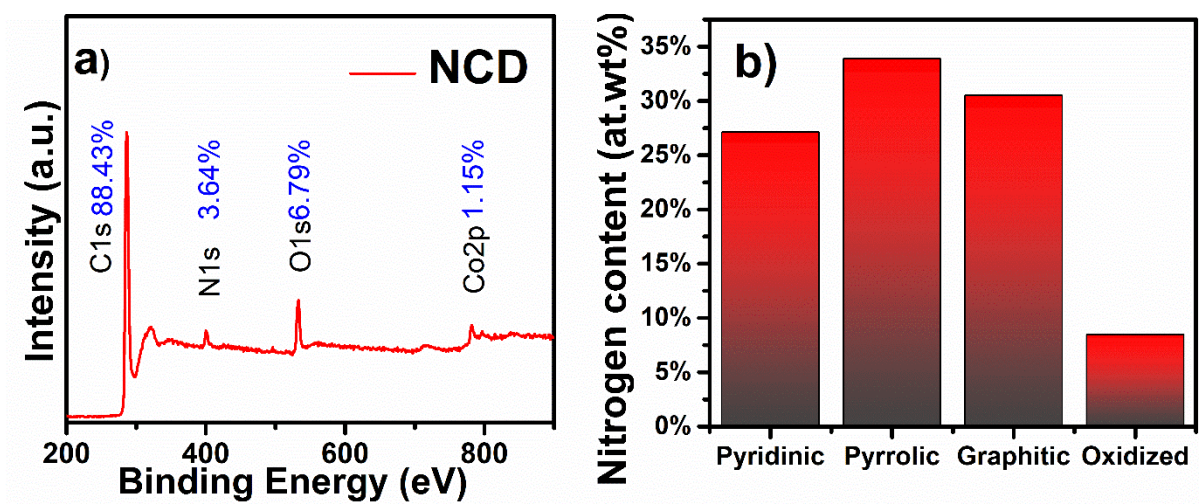

**Figure S3.** (a) XPS survey spectrum of the NCD, (b) the contents of different types of nitrogen in the NCD.

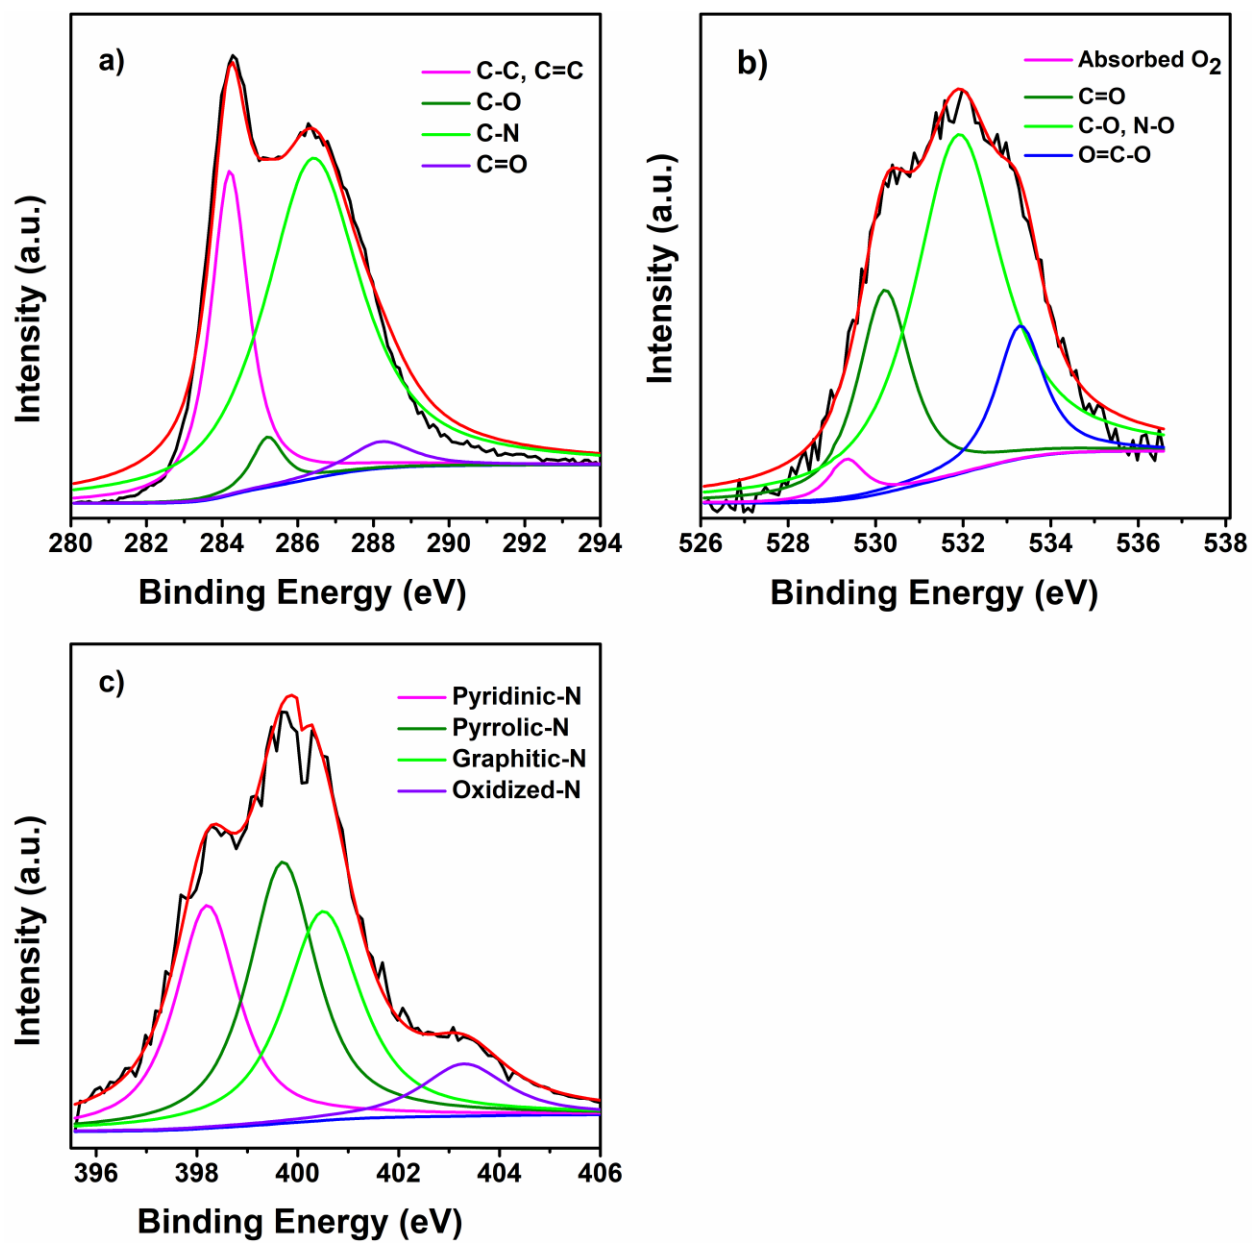

**Figure S4.** High resolution XPS spectra of C 1s (a), O 1s (b), and N 1s (c) of NCD.
